# Supplementary material for: US Trends in Cholesterol Screening, Lipid Levels, and Lipid‐Lowering Medication Use in US Adults, 1999 to 2018
Source: PubMed Central journal article supplement — J Am Heart Assoc. 2023 Jan 10;12(3):e028205. doi: 10.1161/JAHA.122.028205 (PMC9973640; doi:10.1161/jaha.122.028205), 2023-01-10
Supplement: JAH3-12-e028205-s001.pdf [file JAH3-12-e028205-s001.pdf]

# Supplemental Material

## Data S1.

### Supplemental Methods

#### *Methods used to determine piece-wise spline models to model nonlinear trends*

We used the midpoint of each 2-year survey time as a continuous variable to test for linear trends using linear or logistic regression models. If the overall model fit improved after adding a quadratic term of survey time based on the likelihood ratio test, we then modeled the trends using spline models to facilitate the interpretations of a nonlinear relationship between time and outcome measures in a clinical context. The number of inflection points was determined based on the flexible and informed Bayesian regression analysis with multiple change points (the R package [mcp]). The test results favored use of one inflection point for trends analysis.

#### *Multiple imputation*

We first examined missing data patterns for our primary analysis. Among 50,928 study participants included, 3,141 (6.2%) participants had missing values for total cholesterol and 3,143 (6.2%) participants had missing HDL-C values. Among 24,651 participants who had fasting blood samples, 1,666 (6.8%) participants had missing values for both triglycerides and LDL-C. To account for data missingness and reduce bias derived from non-response, we conducted multiple imputation under the assumption that data were missing at random. The multiple imputation model included 8 variables, 4 of key outcomes (total cholesterol, triglycerides, LDL-C, and HDL-C) and 4 variables with no missing information as predictors of missing values (age, sex, survey weights, and a unique identifier combining both primary survey unit and stratum of NHANES).<sup>36</sup> Examination weights were used for total cholesterol and HDL-C and fasting weights were used for triglycerides and LDL-C. Multivariate normal distribution was used with five imputed datasets. Triglycerides were log-transformed before imputation and then transformed back before analysis. Stata, version 15.1 (StataCorp, College Station, TX) and code `mi set`, `mi register`, and `mi impute` were used to conduct multiple imputation.

**Table S1. Age-Sex-Adjusted Point Estimates (95% Confidence Intervals) in Lipid Levels after Multiple Imputation**

| <b>Mean Lipid Levels, mg/dL</b>                                                                                                                                   | <b>NHANES 2017-2018</b> | <b>NHANES 2017-March 2020 Pre-Pandemic</b> |
|-------------------------------------------------------------------------------------------------------------------------------------------------------------------|-------------------------|--------------------------------------------|
| Total cholesterol                                                                                                                                                 | 188.6 (185.5-191.7)     | 186.5 (184.1-188.8)                        |
| Triglycerides                                                                                                                                                     | 91.5 (88.4-94.6)        | 90.6 (87.9-93.4)                           |
| LDL-C                                                                                                                                                             | 111.6 (108.9-114.4)     | 110.5 (108.1-112.9)                        |
| HDL-C                                                                                                                                                             | 53.5 (52.6-54.3)        | 53.5 (52.8-54.2)                           |
| Abbreviations: HDL-C, high-density lipoprotein cholesterol; LDL-C, low-density lipoprotein cholesterol; NHANES, National Health and Nutrition Examination Survey. |                         |                                            |

**Table S2. Age-sex-adjusted proportions (95% confidence intervals) of cholesterol screening by race and ethnicity, NHANES 1999-2018**

| Cholesterol Screening             | 1999-2000            | 2001-2002            | 2003-2004            | 2005-2006            | 2007-2008            | 2009-2010            | 2011-2012            | 2013-2014            | 2015-2016            | 2017-2018            | <i>P</i> for linear trend | <i>P</i> for non-linear trend |
|-----------------------------------|----------------------|----------------------|----------------------|----------------------|----------------------|----------------------|----------------------|----------------------|----------------------|----------------------|---------------------------|-------------------------------|
| <b>Ever Screened, %</b>           |                      |                      |                      |                      |                      |                      |                      |                      |                      |                      |                           |                               |
| Non-Hispanic Asian                | -                    | -                    | -                    | -                    | -                    | -                    | 74.2<br>(70.1, 77.8) | 78.5<br>(73.8, 82.5) | 79.7<br>(74.8, 83.9) | 80.5<br>(75.6, 84.6) | .056                      |                               |
| Hispanic                          | 59.8<br>(54.8, 64.6) | 57.4<br>(52.4, 62.3) | 59.3<br>(53.8, 64.7) | 57.3<br>(53.6, 60.9) | 60.9<br>(58.5, 63.3) | 59.9<br>(57.4, 62.3) | 64.1<br>(60.9, 67.2) | 70.0<br>(67.5, 72.4) | 70.7<br>(67.2, 74.1) | 72.6<br>(67.4, 77.3) |                           | .003                          |
| Non-Hispanic Black                | 60.2<br>(56.2, 64.0) | 64.8<br>(60.0, 69.3) | 66.7<br>(64.8, 68.5) | 69.6<br>(66.6, 72.4) | 72.3<br>(69.9, 74.6) | 68.9<br>(64.8, 72.7) | 75.2<br>(70.1, 79.7) | 75.3<br>(72.0, 78.4) | 78.8<br>(75.9, 81.5) | 76.8<br>(74.0, 79.4) | <.001                     |                               |
| Non-Hispanic White                | 74.9<br>(70.1, 79.1) | 73.7<br>(71.7, 75.6) | 74.7<br>(71.4, 77.7) | 77.3<br>(75.1, 79.3) | 75.8<br>(72.7, 78.6) | 75.6<br>(73.6, 77.5) | 76.9<br>(75.1, 78.7) | 80.2<br>(78.3, 82.0) | 83.4<br>(80.9, 85.6) | 84.2<br>(81.0, 86.9) |                           | .014                          |
| <i>P</i> for group difference     | <.001                | <.001                | <.001                | <.001                | <.001                | <.001                | <.001                | <.001                | <.001                | <.001                |                           | <.001                         |
| <b>Screened within 5 Years, %</b> |                      |                      |                      |                      |                      |                      |                      |                      |                      |                      |                           |                               |
| Non-Hispanic Asian                | -                    | -                    | -                    | -                    | -                    | -                    | 68.3<br>(65.0, 71.5) | 73.1<br>(68.0, 77.6) | 74.1<br>(68.0, 79.3) | 75.0<br>(69.5, 79.8) | .052                      |                               |
| Hispanic                          | 56.5<br>(51.3, 61.6) | 51.1<br>(45.7, 56.4) | 52.6<br>(47.1, 58.0) | 52.0<br>(47.9, 56.0) | 55.6<br>(52.8, 58.4) | 54.8<br>(52.4, 57.2) | 58.8<br>(55.4, 62.2) | 62.7<br>(59.8, 65.4) | 64.2<br>(60.2, 68.0) | 65.8<br>(60.7, 70.5) | <.001                     |                               |
| Non-Hispanic Black                | 55.8<br>(51.5, 60.0) | 57.7<br>(52.8, 62.4) | 62.4<br>(59.0, 65.6) | 62.3<br>(59.4, 65.1) | 66.8<br>(63.9, 69.5) | 64.9<br>(61.4, 68.3) | 70.2<br>(64.9, 75.0) | 71.5<br>(67.8, 74.8) | 71.9<br>(68.9, 74.7) | 70.7<br>(67.2, 73.9) | <.001                     |                               |

|                                                                                                                                            |                         |                         |                         |                         |                         |                         |                         |                         |                         |                         |       |  |
|--------------------------------------------------------------------------------------------------------------------------------------------|-------------------------|-------------------------|-------------------------|-------------------------|-------------------------|-------------------------|-------------------------|-------------------------|-------------------------|-------------------------|-------|--|
| Non-Hispanic White                                                                                                                         | 66.4<br>(61.9,<br>70.7) | 64.5<br>(61.8,<br>67.1) | 66.6<br>(62.7,<br>70.3) | 68.2<br>(65.4,<br>71.0) | 67.8<br>(64.7,<br>70.6) | 68.7<br>(66.8,<br>70.6) | 70.1<br>(67.5,<br>72.7) | 73.5<br>(71.5,<br>75.4) | 74.2<br>(71.1,<br>77.1) | 74.1<br>(70.9,<br>77.2) | <.001 |  |
| <i>P</i> for group difference                                                                                                              | <.001                   | <.001                   | <.001                   | <.001                   | <.001                   | <.001                   | <.001                   | <.001                   | <.001                   | <.001                   | <.001 |  |
| Non-linear trend was tested by adding a quadratic term of survey time into regression models. If not significant, linear trend was tested. |                         |                         |                         |                         |                         |                         |                         |                         |                         |                         |       |  |

**Table S3. Age-sex-adjusted mean (95% confidence intervals) lipid levels by race and ethnicity, NHANES 1999-2018**

| <b>Cholesterol Screening</b>    | <b>1999-2000</b>        | <b>2001-2002</b>        | <b>2003-2004</b>        | <b>2005-2006</b>        | <b>2007-2008</b>        | <b>2009-2010</b>        | <b>2011-2012</b>        | <b>2013-2014</b>        | <b>2015-2016</b>        | <b>2017-March 2020</b>  | <b><i>P</i> for linear trend</b> | <b><i>P</i> for non-linear trend</b> |
|---------------------------------|-------------------------|-------------------------|-------------------------|-------------------------|-------------------------|-------------------------|-------------------------|-------------------------|-------------------------|-------------------------|----------------------------------|--------------------------------------|
| <b>Total Cholesterol, mg/dL</b> |                         |                         |                         |                         |                         |                         |                         |                         |                         |                         |                                  |                                      |
| Non-Hispanic Asian              | -                       | -                       | -                       | -                       | -                       | -                       | 191.0<br>(187.6, 194.5) | 190.4<br>(187.1, 193.7) | 190.5<br>(186.4, 194.6) | 191.7<br>(186.3, 197.1) | .92                              |                                      |
| Hispanic                        | 201.9<br>(198.2, 205.6) | 201.9<br>(196.0, 207.8) | 201.6<br>(198.6, 204.7) | 202.2<br>(199.3, 205.2) | 198.4<br>(196.1, 200.8) | 196.8<br>(194.4, 199.2) | 195.1<br>(192.4, 197.9) | 192.6<br>(189.5, 195.7) | 190.3<br>(187.9, 192.8) | 188.6<br>(184.0, 193.1) | <.001                            |                                      |
| Non-Hispanic Black              | 196.0<br>(193.6, 198.4) | 198.8<br>(194.0, 203.6) | 196.3<br>(193.3, 199.3) | 189.8<br>(187.4, 192.1) | 192.4<br>(189.4, 195.5) | 190.0<br>(187.8, 192.2) | 188.9<br>(186.7, 191.2) | 182.6<br>(179.9, 185.3) | 185.1<br>(181.4, 188.8) | 185.3<br>(181.7, 189.0) | <.001                            |                                      |
| Non-Hispanic White              | 204.7<br>(201.7, 207.7) | 201.5<br>(199.0, 204.0) | 201.8<br>(200.1, 203.5) | 198.4<br>(196.7, 200.2) | 196.8<br>(194.7, 198.8) | 195.5<br>(193.1, 197.9) | 195.2<br>(192.8, 197.7) | 189.3<br>(187.4, 191.1) | 192.7<br>(190.2, 195.1) | 188.3<br>(184.3, 192.4) | <.001                            |                                      |
| <i>P</i> for group difference   | .18                     | .89                     | .92                     | .045                    | .17                     | .50                     | <.001                   | .003                    | .002                    | .003                    | <.001                            |                                      |
| <b>Triglycerides, mg/dL</b>     |                         |                         |                         |                         |                         |                         |                         |                         |                         |                         |                                  |                                      |
| Non-Hispanic Asian              | -                       | -                       | -                       | -                       | -                       | -                       | 106.9<br>(101.1, 113.0) | 96.2<br>(88.8, 104.1)   | 93.9<br>(87.5, 100.9)   | 97.6<br>(88.4, 107.9)   | .084                             |                                      |
| Hispanic                        | 128.1<br>(120.8, 135.8) | 130.7<br>(119.3, 143.3) | 129.1<br>(121.9, 136.8) | 127.2<br>(118.7, 136.2) | 122.2<br>(117.3, 127.4) | 122.5<br>(115.9, 129.6) | 117.2<br>(111.9, 122.7) | 108.7<br>(102.5, 115.4) | 101.9<br>(98.1, 105.8)  | 103.2<br>(97.3, 109.6)  |                                  | .004                                 |
| Non-Hispanic Black              | 91.7<br>(88.7, 94.8)    | 94.4<br>(85.9, 103.7)   | 97.6<br>(92.4, 103.1)   | 94.7<br>(89.9, 99.6)    | 85.5<br>(77.7, 94.1)    | 89.6<br>(84.6, 95.0)    | 85.0<br>(80.1, 90.3)    | 75.6<br>(70.1, 81.5)    | 71.3<br>(66.5, 76.4)    | 70.9<br>(68.0, 73.9)    |                                  | <.001                                |
| Non-Hispanic White              | 124.1<br>(118.1, 130.5) | 122.6<br>(117.8, 127.7) | 122.2<br>(116.6, 128.0) | 117.2<br>(112.0, 122.5) | 113.5<br>(108.7, 118.5) | 106.3<br>(103.1, 109.5) | 112.5<br>(106.9, 118.4) | 98.1<br>(93.5, 102.9)   | 93.9<br>(90.0, 98.0)    | 91.0<br>(86.4, 95.9)    |                                  | .006                                 |

|                                                                                                                                            |                            |                            |                            |                            |                            |                            |                            |                            |                            |                            |       |       |
|--------------------------------------------------------------------------------------------------------------------------------------------|----------------------------|----------------------------|----------------------------|----------------------------|----------------------------|----------------------------|----------------------------|----------------------------|----------------------------|----------------------------|-------|-------|
| <i>P</i> for group difference                                                                                                              | <.001                      | <.001                      | <.001                      | <.001                      | <.001                      | <.001                      | <.001                      | <.001                      | <.001                      | <.001                      |       | <.001 |
| <b>LDL-C, mg/dL</b>                                                                                                                        |                            |                            |                            |                            |                            |                            |                            |                            |                            |                            |       |       |
| Non-Hispanic Asian                                                                                                                         | -                          | -                          | -                          | -                          | -                          | -                          | 115.7<br>(110.0,<br>121.5) | 109.6<br>(104.7,<br>114.6) | 113.0<br>(107.7,<br>118.3) | 114.6<br>(106.8,<br>122.5) | .98   |       |
| Hispanic                                                                                                                                   | 126.9<br>(124.2,<br>129.7) | 118.3<br>(114.3,<br>122.2) | 118.5<br>(114.5,<br>122.4) | 122.5<br>(118.2,<br>126.8) | 120.1<br>(117.4,<br>122.9) | 119.3<br>(116.1,<br>122.4) | 118.9<br>(116.2,<br>121.6) | 115.4<br>(110.7,<br>120.2) | 113.6<br>(111.7,<br>115.6) | 113.4<br>(108.5,<br>118.3) | <.001 |       |
| Non-Hispanic Black                                                                                                                         | 121.4<br>(117.3,<br>125.5) | 121.2<br>(116.8,<br>125.6) | 115.5<br>(112.2,<br>118.8) | 112.1<br>(108.5,<br>115.8) | 113.8<br>(109.6,<br>118.0) | 116.2<br>(113.5,<br>118.9) | 112.8<br>(109.6,<br>115.9) | 109.2<br>(105.5,<br>112.8) | 108.9<br>(103.4,<br>114.5) | 110.8<br>(106.8,<br>114.8) | <.001 |       |
| Non-Hispanic White                                                                                                                         | 128.6<br>(125.1,<br>132.1) | 123.0<br>(120.0,<br>126.1) | 119.9<br>(117.3,<br>122.6) | 117.4<br>(114.1,<br>120.7) | 117.2<br>(115.4,<br>119.0) | 116.6<br>(113.3,<br>120.0) | 116.4<br>(114.0,<br>118.8) | 112.9<br>(110.8,<br>115.0) | 113.3<br>(110.4,<br>116.2) | 110.6<br>(107.0,<br>114.1) | <.001 |       |
| <i>P</i> for group difference                                                                                                              | .041                       | .167                       | .091                       | .016                       | .036                       | .471                       | .098                       | .243                       | .512                       | .752                       |       | <.001 |
| <b>HDL-C, mg/dL</b>                                                                                                                        |                            |                            |                            |                            |                            |                            |                            |                            |                            |                            |       |       |
| Non-Hispanic Asian                                                                                                                         | -                          | -                          | -                          | -                          | -                          | -                          | 53.5<br>(52.5,<br>54.6)    | 53.5<br>(52.2,<br>54.7)    | 54.7<br>(53.4,<br>56.1)    | 53.7<br>(52.4,<br>55.0)    | .56   |       |
| Hispanic                                                                                                                                   | 47.5<br>(46.5,<br>48.5)    | 49.1<br>(48.3,<br>50.0)    | 51.1<br>(50.0,<br>52.3)    | 51.2<br>(49.8,<br>52.6)    | 49.1<br>(48.2,<br>50.0)    | 50.3<br>(48.8,<br>51.7)    | 49.6<br>(48.8,<br>50.5)    | 50.0<br>(49.1,<br>50.9)    | 50.1<br>(48.6,<br>51.6)    | 50.2<br>(49.4,<br>51.1)    | .035  |       |
| Non-Hispanic Black                                                                                                                         | 53.4<br>(51.9,<br>54.9)    | 54.3<br>(53.0,<br>55.6)    | 56.4<br>(55.0,<br>57.9)    | 57.0<br>(56.2,<br>57.9)    | 56.5<br>(55.5,<br>57.5)    | 54.9<br>(53.5,<br>56.2)    | 54.5<br>(53.5,<br>55.4)    | 54.7<br>(53.6,<br>55.8)    | 58.0<br>(57.0,<br>59.1)    | 56.3<br>(55.4,<br>57.3)    | .01   |       |
| Non-Hispanic White                                                                                                                         | 50.5<br>(48.6,<br>52.4)    | 51.8<br>(51.0,<br>52.6)    | 54.1<br>(53.0,<br>55.1)    | 54.4<br>(53.6,<br>55.2)    | 51.8<br>(50.2,<br>53.3)    | 53.4<br>(52.2,<br>54.5)    | 53.0<br>(51.7,<br>54.3)    | 53.3<br>(52.6,<br>54.1)    | 56.4<br>(54.9,<br>57.9)    | 53.9<br>(52.7,<br>55.2)    | <.001 |       |
| <i>P</i> for group difference                                                                                                              | .016                       | .002                       | <.001                      | <.001                      | .010                       | .013                       | <.001                      | <.001                      | <.001                      | <.001                      |       | <.001 |
| Non-linear trend was tested by adding a quadratic term of survey time into regression models. If not significant, linear trend was tested. |                            |                            |                            |                            |                            |                            |                            |                            |                            |                            |       |       |

**Figure S1. Age-Sex-Adjusted Trends in Lipid Levels in US Adults after Multiple Imputation, NHANES 1999-2018**

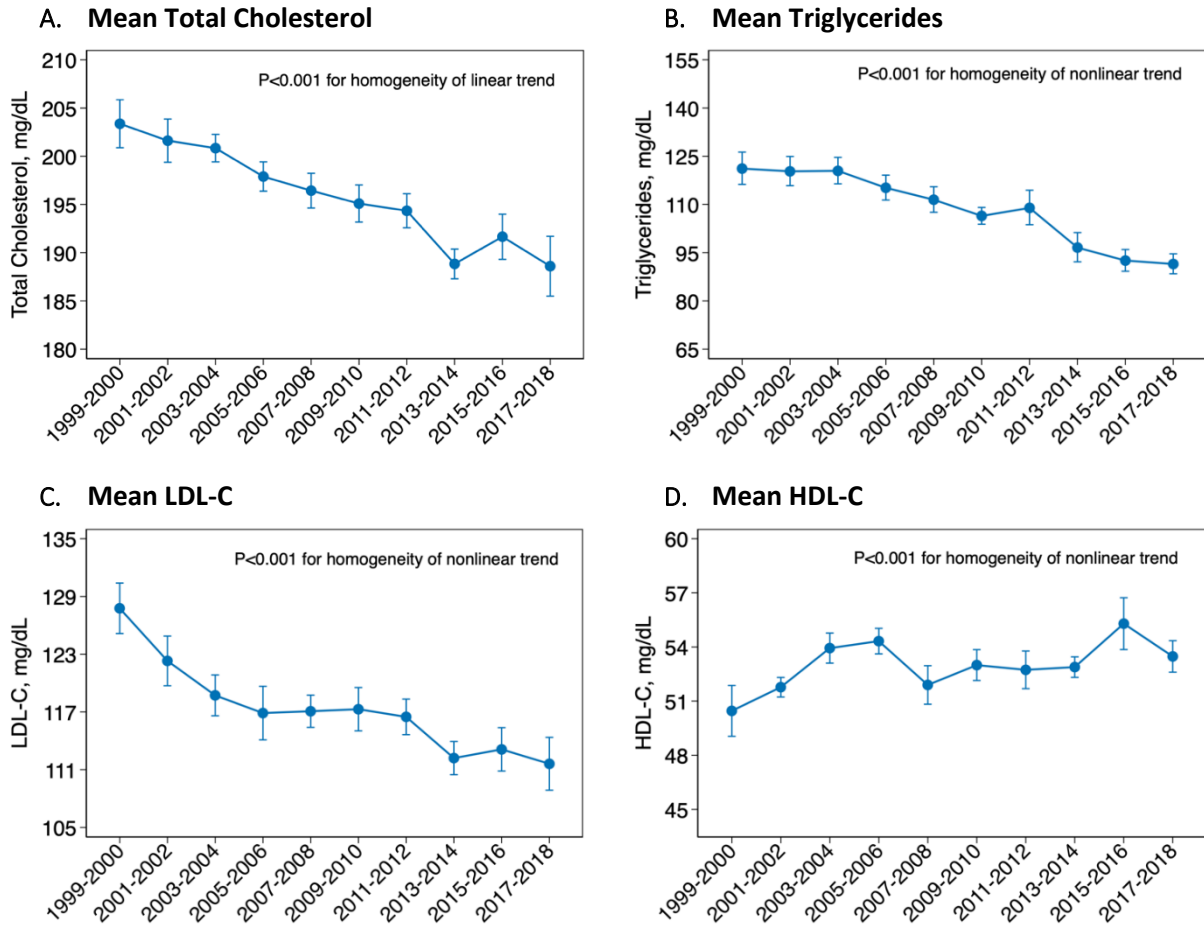

Error bars indicate 95% confidence intervals. Abbreviations: HDL-C, high-density lipoprotein cholesterol; LDL-C, low-density lipoprotein cholesterol; NHANES, National Health and Nutrition Examination Survey.



**Figure S2. Trends in prevalence of high LDL-C in US adults, NHANES 1999-2018**

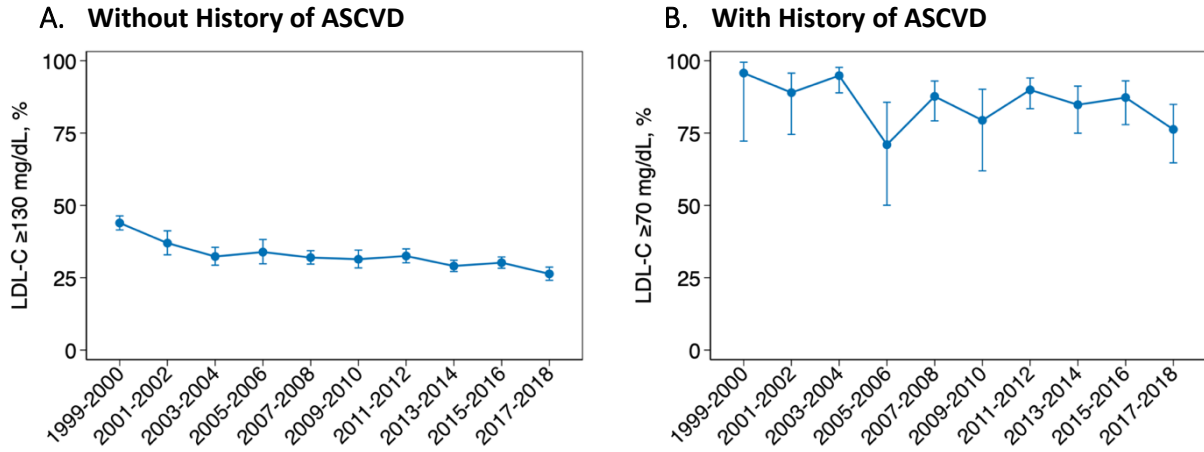

ASCVD was defined as a self-reported history of coronary heart disease, heart attack, stroke, or angina. Error bars indicate 95% confidence intervals. Abbreviations: ASCVD, atherosclerotic cardiovascular disease; NHANES, National Health and Nutrition Examination Survey.

**Figure S3. Trends in use of statin and another lipid-lowering drug in statin-eligible US adults, NHANES 1999-2018**

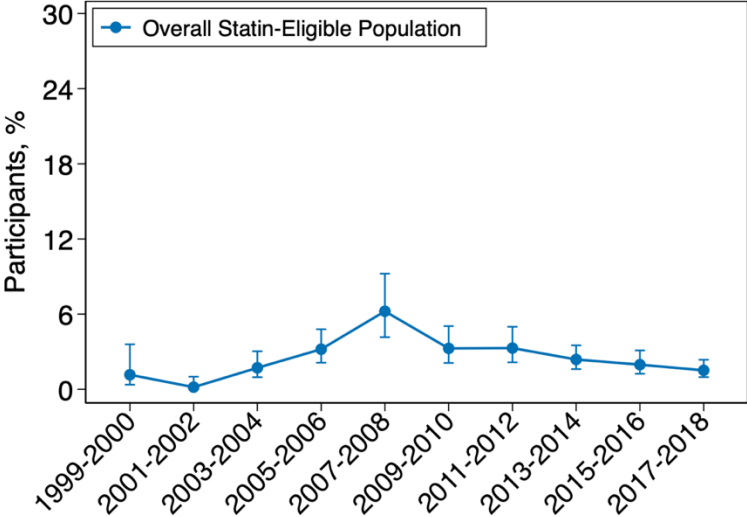

Error bars indicate 95% confidence intervals.

Figure S4. Trends in non-statin use in statin-eligible US adults by drug class, NHANES 1999-2018

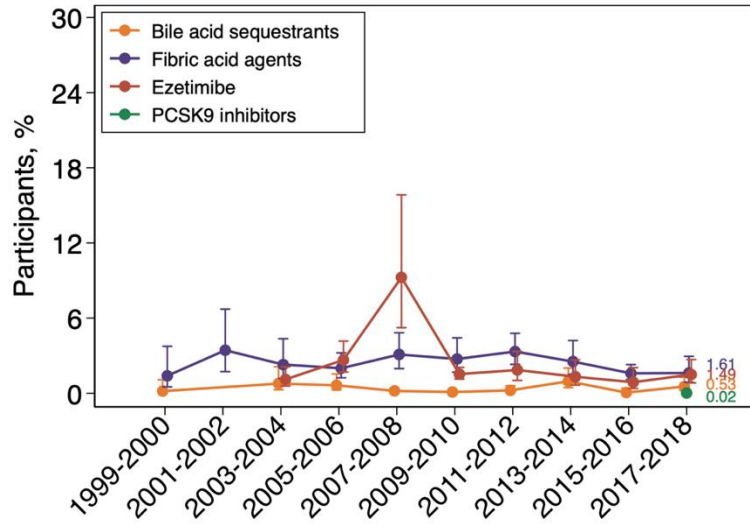

Error bars indicate 95% confidence intervals.

**Figure S5. Trends in cholesterol screening in US adults by race and ethnicity, NHANES 1999-2018**

**A. Cholesterol Ever Screened**

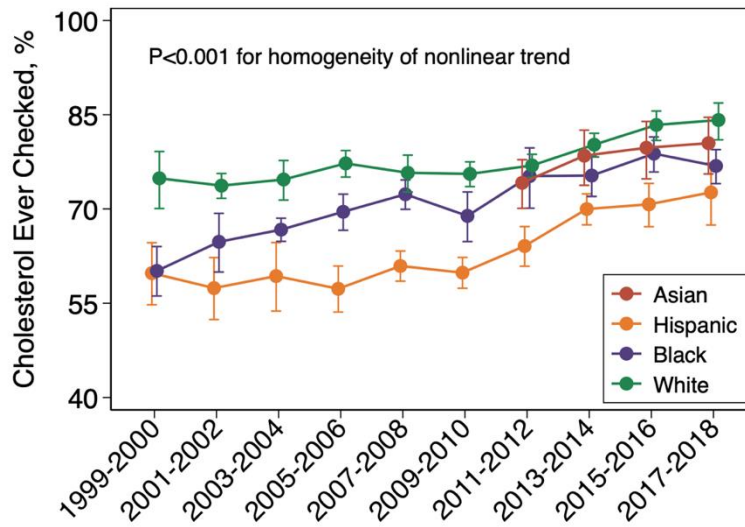

**B. Cholesterol Screened within 5 Years**

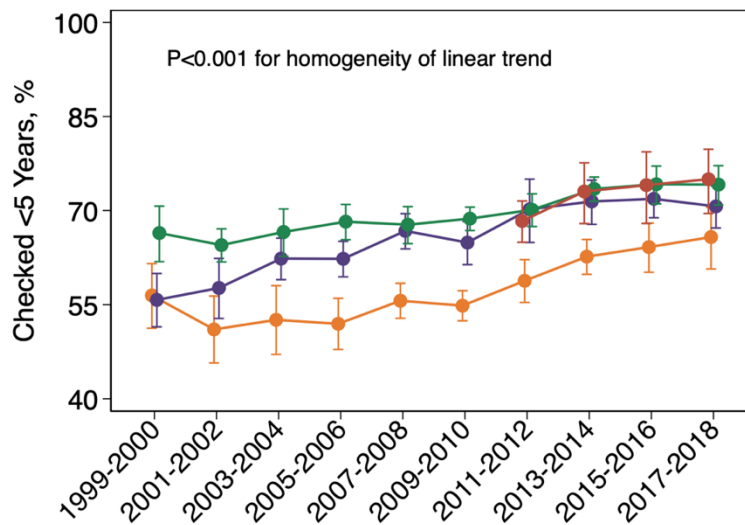

Error bars indicate 95% confidence intervals. Abbreviations: NHANES, National Health and Nutrition Examination Survey.

**Figure S6. Trends in lipid levels in US adults by race and ethnicity, NHANES 1999-2018**

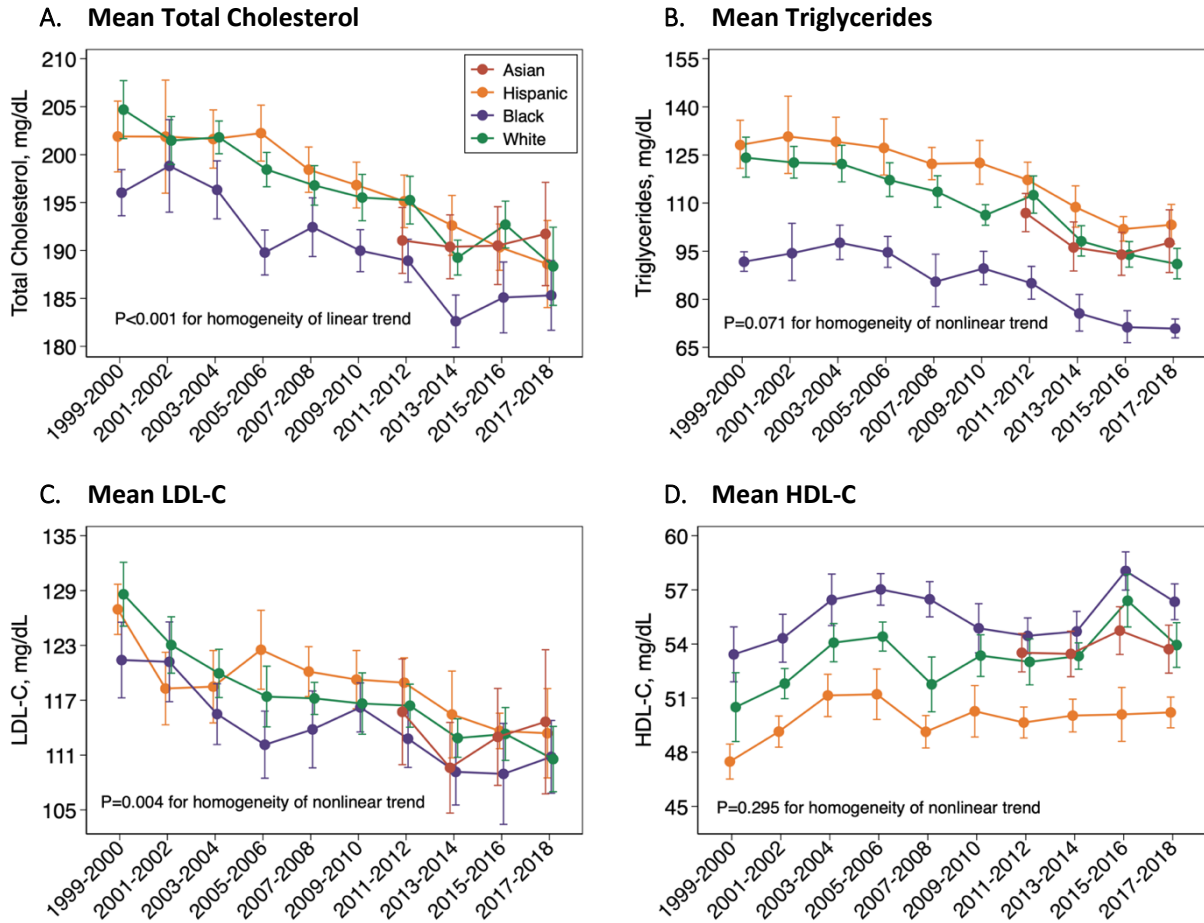

Error bars indicate 95% confidence intervals. Abbreviations: HDL-C, high-density lipoprotein cholesterol; LDL-C, low-density lipoprotein cholesterol. Abbreviations: NHANES, National Health and Nutrition Examination Survey.
